# Supplementary material
Source: publisher figshare collection journal article supplement (https://frontiersin.figshare.com/ndownloader/files/13754537)
Supplement: Supplementary file [file 13754537]

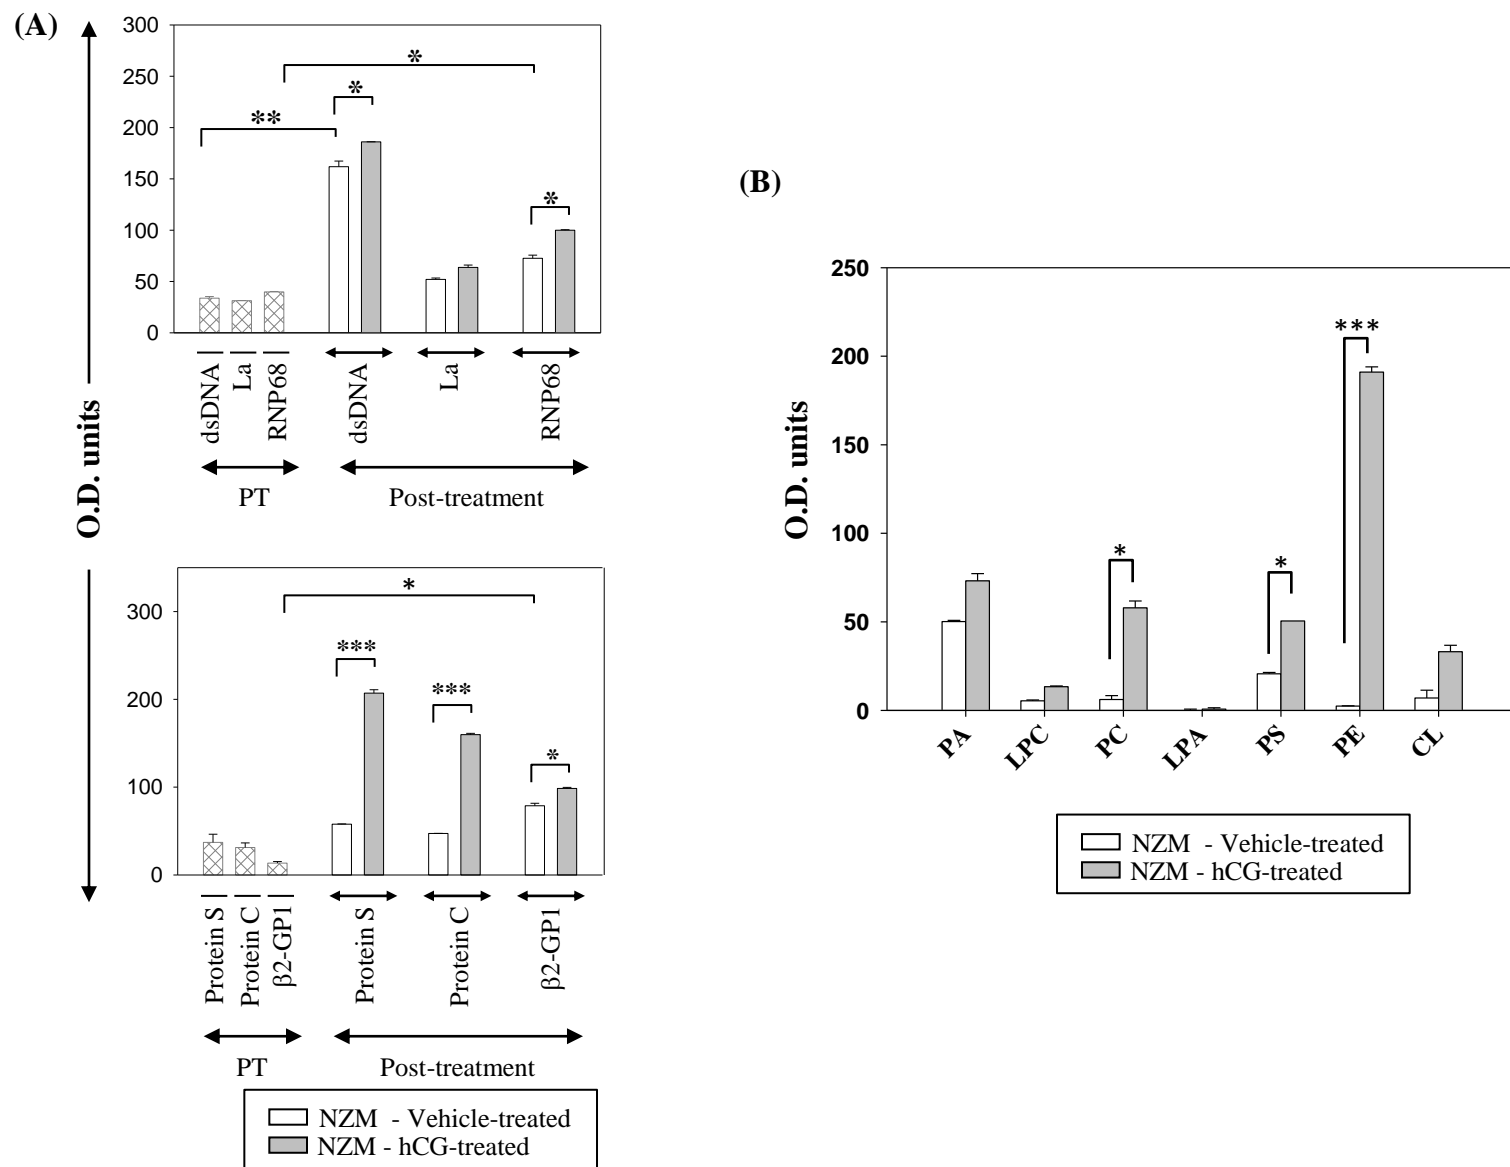

**Supplementary Figure S3:** Reactivity of antibodies in pooled sera from NZM (vehicle-treated and hCG-treated, Week 38) mice towards conventional autoantigens and clotting factors. (A) Reactivity towards dsDNA, ribonucleoprotein autoantigens (top panel) and clotting factors (bottom panel). Bars represent arithmetic means  $\pm$  SEM (from four independent experiments) of O.D. units (O.D.  $\times$  dilution factor). PT: Pre-treatment. (B) Reactivity towards phospholipids. Bars represents arithmetic means  $\pm$  SEM (from three independent experiments) of O.D. units (O.D.  $\times$  serum dilution factor). \* $p < 0.05$ , \*\* $p < 0.001$ , \*\*\* $p < 0.001$ . PA: Phosphatidic Acid; LPC: Lysophosphatidylcholine; PC: Phosphatidylcholine; LPA: Lysophosphatidic acid; PS: Phosphatidylserine; PE: Phosphatidylethanolamine; CL: Cardiolipin.
